# Supplementary material for: Bleeding Complications in Anticoagulated Patients With Atrial Fibrillation and Sepsis: A Propensity‐Weighted Cohort Study
Source: PubMed Central journal article supplement — J Am Heart Assoc. 2017 Nov 9;6(11):e007453. doi: 10.1161/JAHA.117.007453 (PMC5721800; doi:10.1161/jaha.117.007453), 2017-11-09
Supplement: JAH3-6-e007453-s001.pdf [file JAH3-6-e007453-s001.pdf]

# **SUPPLEMENTAL MATERIAL**

**Table S1.** Definitions on comorbidity and concomitant medication according to ICD-10 codes and ATC-codes.

| <b>Diagnoses</b>          | <b>International Classification of Diseases 10th revision (ICD-10) code</b>                                                    | <b>Anatomical Therapeutic Chemical (ATC) code</b> |
|---------------------------|--------------------------------------------------------------------------------------------------------------------------------|---------------------------------------------------|
| Atrial fibrillation       | I48                                                                                                                            |                                                   |
| Sepsis                    | A02.1 A28.2B A267 A327<br>A392 A394 A40 A41 A42.7<br>A49.9A B37.7 B49.9A R572                                                  |                                                   |
| Severe sepsis             | A419C R572                                                                                                                     |                                                   |
| Ischemic stroke           | I63 I64                                                                                                                        |                                                   |
| Systemic embolism         | I74                                                                                                                            |                                                   |
| Prior bleeding            | K250 K252 K254 K260 K262<br>K264 K270 K272 K274 K280<br>K282 K290 K920 K921 K922<br>D62 J942 H113 H356 H431<br>N02 R04 R31 R58 |                                                   |
| Prior stroke              |                                                                                                                                |                                                   |
| Heart failure or LVD      | I110 I130 I132 I420 I50                                                                                                        |                                                   |
| Hypertension              |                                                                                                                                | See specified definition <sup>a</sup>             |
| Vascular disease          | I702 I703 I704 I705 I706<br>I707 I708 I709 I71 I739                                                                            |                                                   |
| Renal dysfunction         | I12 I13 N00 N01 N02 N03<br>N04 N05 N07 N11 N14 N17<br>N18 N19 Q61                                                              |                                                   |
| Diabetes                  | E100 E101 E109 E110 E111<br>E119                                                                                               | A10                                               |
| Chronic pulmonary disease | J40 J41 J42 J43 J44 J45 J46<br>J47 J60 J61 J62 J63 J64 J65<br>J67 J684 J701 J703 J841 J920<br>J961 J982 J983                   |                                                   |
| Cancer                    | C                                                                                                                              |                                                   |
| Alcohol-related disease   | E224 E529A F10 G312 G621<br>G721 I426 K292 K70 K860                                                                            |                                                   |

|                                               |                                          |                                                                                 |
|-----------------------------------------------|------------------------------------------|---------------------------------------------------------------------------------|
|                                               | L278A O354 T51 Z714 Z721                 |                                                                                 |
| Osteoporosis                                  |                                          |                                                                                 |
| Dementia                                      | F00 F01 F02 F03 G30                      |                                                                                 |
| Depression                                    | F32 F33                                  |                                                                                 |
| Pneumonia within last 365 days                | J12 J13 J14 J15 J16 J17 J18<br>A481 A709 |                                                                                 |
| Ulcer disease                                 | K221 K25 K26 K27 K28                     |                                                                                 |
| Medications within 365 days before index date |                                          |                                                                                 |
| Coumarin                                      |                                          | B01AA                                                                           |
| NOAC                                          |                                          | B01AF01 B01AF02<br>B01AE07                                                      |
| Digoxin                                       |                                          | C01AA05                                                                         |
| Non-loop diuretics                            |                                          | C02DA C02L C03A C03B<br>C03D C03E C03X C07C<br>C07D C08G C09BA C09DA<br>C09XA52 |
| Loop diuretics                                |                                          | C03C                                                                            |
| Beta-blocker                                  |                                          | C07                                                                             |
| Calcium channel blocker                       |                                          | C07F C08 C09BB C09DB                                                            |
| Renin-angiotensin inhibitor                   |                                          | C09                                                                             |
| Aspirin                                       |                                          | B01AC06                                                                         |
| Clopidogrel                                   |                                          | B01AC04                                                                         |
| Statins                                       |                                          | C10                                                                             |
| NSAID                                         |                                          | M01A                                                                            |
| Systemic corticosteroids                      |                                          | H02                                                                             |
| Proton pump inhibitors                        |                                          | A02BC                                                                           |

Abbreviations: NOAC, Non-vitamin K oral anticoagulant; NSAID, Non-steroidal anti-inflammatory drugs.

<sup>a</sup>We identified subjects with hypertension from combination treatment with at least two of the following classes of antihypertensive drugs:

I. Alpha adrenergic blockers (C02A, C02B, C02C)

II· Non-loop diuretics (C02DA, C02L, C03A, C03B, C03D, C03E, C03X, C07C, C07D, C08G, C09BA, C09DA, C09XA52)

III· Vasodilators (C02DB, C02DD, C02DG, C04, C05)

IV· Beta blockers (C07)

V· Calcium channel blockers (C07F, C08, C09BB, C09DB)

VI· Renin-angiotensin system inhibitors (C09)

**Table S2.** Risk score definitions.

| <b>Risk score</b>                                                                       | <b>Points<br/>if<br/>present</b> |
|-----------------------------------------------------------------------------------------|----------------------------------|
| <b>CHA<sub>2</sub>DS<sub>2</sub>VASc</b> *                                              |                                  |
| Congestive heart failure or Left Ventricular Dysfunction                                | 1                                |
| Hypertension                                                                            | 1                                |
| Age ≥ 65 years                                                                          | 1                                |
| Age ≥ 75 years                                                                          | 1                                |
| Diabetes mellitus                                                                       | 1                                |
| Stroke (ischemic stroke, transient ischemic disease or systemic embolism)               | 2                                |
| Vascular disease (myocardial infarction, peripheral arterial disease, or aortic plaque) | 1                                |
| Sex category (female)                                                                   | 1                                |
| <b>HAS-BLED</b> **                                                                      |                                  |
| Hypertension                                                                            | 1                                |
| Abnormal renal function                                                                 | 1                                |
| Abnormal hepatic function                                                               | 1                                |
| Stroke (ischemic stroke or transient ischemic attack)                                   | 1                                |
| Bleeding                                                                                | 1                                |
| Labile international normalized ratio ***                                               | 1                                |
| Elderly age (≥ 65 years)                                                                | 1                                |
| Drugs (aspirin, clopidogrel, or non-steroidal anti-inflammatory drugs)                  | 1                                |
| Alcohol intake                                                                          | 1                                |

\*Reflects stroke risk in atrial fibrillation patients not in anticoagulant therapy (Lip GYH, Nieuwlaat R, Pisters R, Lane DA, Crijns HJGM. Refining clinical risk stratification for predicting stroke and thromboembolism in atrial fibrillation using a novel risk factor-based approach: the euro heart survey on atrial fibrillation. *Chest* 2010;137:263-72.

\*\*Reflects bleeding risk in atrial fibrillation patients undergoing anticoagulant therapy (Pisters R, Lane DA, Nieuwlaat R, de Vos CB, Crijns HJGM, Lip GYH. A novel user-friendly score (HAS-BLED) to assess 1-year risk of major bleeding in patients with atrial fibrillation: the Euro Heart Survey. *Chest* 2010;138:1093-100.

\*\*\*Not included due to unavailable information
